# Supplementary material
Source: Springer Nature journal article supplement (https://www.springermedizin.de/resource/supplementary/12889_2010_3373_MOESM1_ESM.pdf/9488868)

Number of respondents

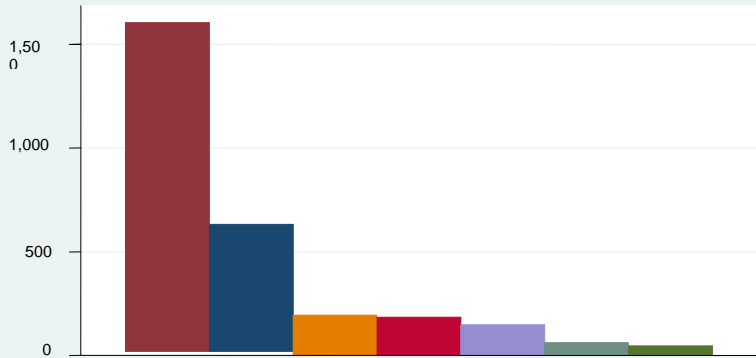

Television

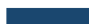

Radio

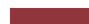

Cinema

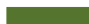

Posters/bill board

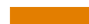

Newspaper

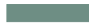

Shops

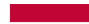

Other source

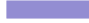

Supplement: MOESM1 [file 9488868]
